# Supplementary material for: Ruddlesden–Popper oxide SrEu2Fe2O7 as a promising symmetrical electrode for pure CO2 electrolysis
Source: Royal Society of Chemistry journal article supplement (doi:10.1039/d0ta09585k), 2020-11-05
Supplement: d0ta09585k1.pdf [file d0ta09585k1.pdf]

# Ruddlesden-Popper Oxide $\text{SrEu}_2\text{Fe}_2\text{O}_7$ as Promising Symmetrical Electrodes for Pure $\text{CO}_2$ Electrolysis

*Daoming Huan<sup>\*a</sup>, Lu Zhang<sup>\*a</sup>, Shaowei Zhang<sup>a</sup>, Nai Shi<sup>a</sup>, Xinyu Li<sup>a</sup>, Kang Zhu<sup>a</sup>,*

*Changrong Xia<sup>\*a</sup>, Ranran Peng<sup>\*a</sup>, Yalin Lu<sup>a</sup>*

<sup>a</sup> CAS Key Laboratory of Materials for Energy Conversion, Department of Materials Science and Engineering, University of Science and Technology of China, Hefei, 230026 Anhui, China.

## **Corresponding Author**

\*Changrong Xia: [xiacr@ustc.edu.cn](mailto:xiacr@ustc.edu.cn)

\*Ranran Peng: [pengrr@ustc.edu.cn](mailto:pengrr@ustc.edu.cn)

## Thermal structural stability

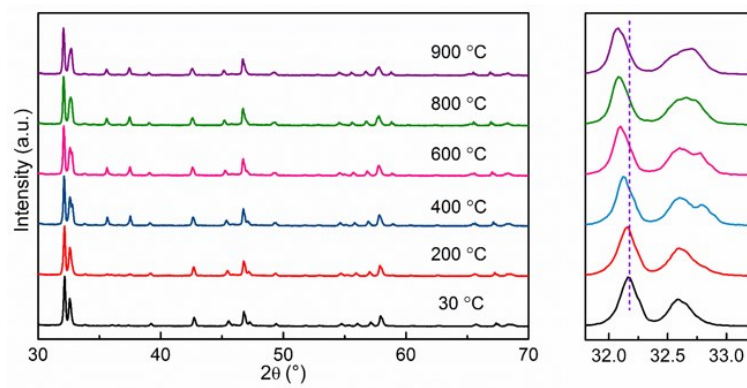

**Figure S1.** *In-situ* XRD patterns for SEF which are measured from 20 to 900 °C.

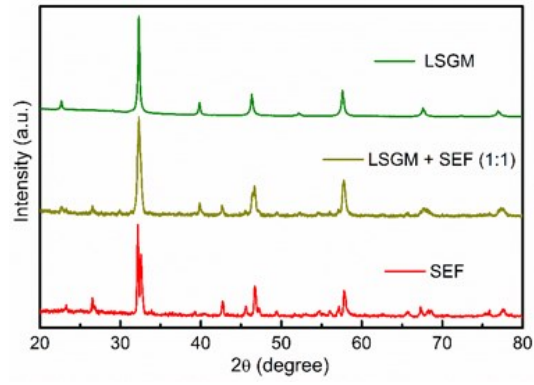

**Figure S2.** Chemical compatibility of LSGM-SEF (weight ratio 1:1) mixed powders calcined at 1000 °C for 2 h.

## SEF rectangular bars

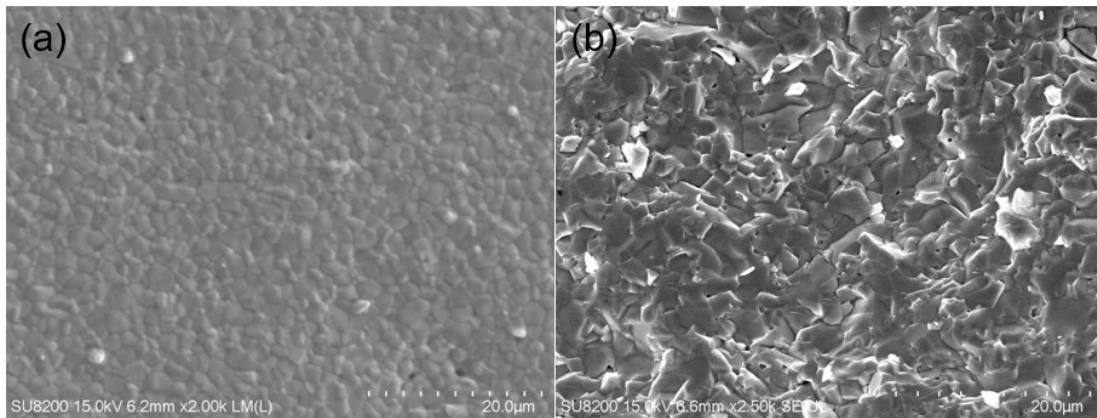

**Figure S3.** (a) surface and (b) cross section microstructures of SEF rectangular bars.

## Oxygen nonstoichiometry

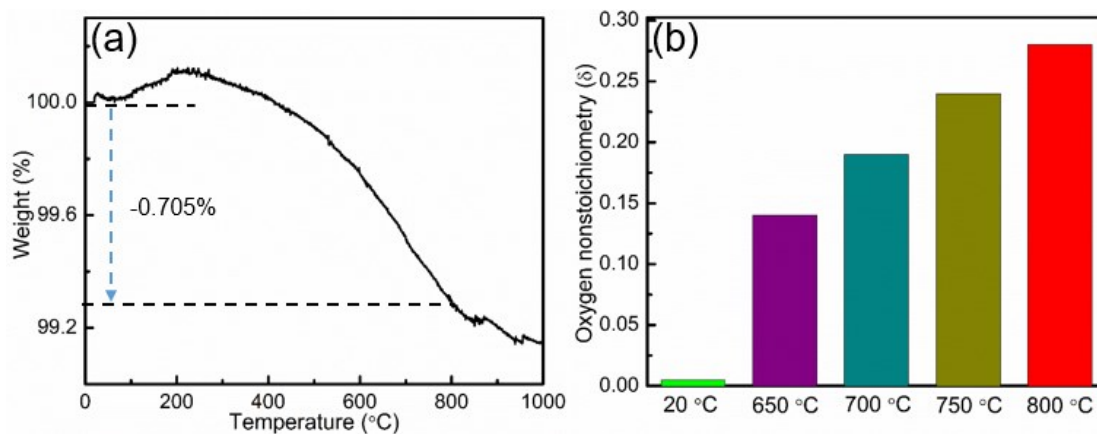

**Figure S4.** (a) TG analysis testing from 20 to 1000 °C and (b) comparison of oxygen nonstoichiometry ( $\delta$ ) at 20, 650, 700, 750 and 800 °C, respectively.

## Section microstructures

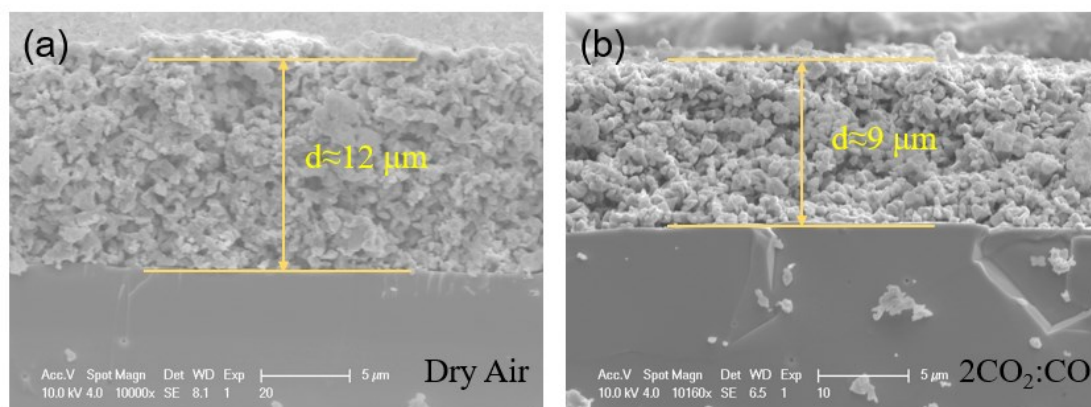

**Figure S5.** Section microstructures of SEF electrode after test in (a) dry air, and (b)  $\text{CO}_2$ -CO (2:1) atmospheres.

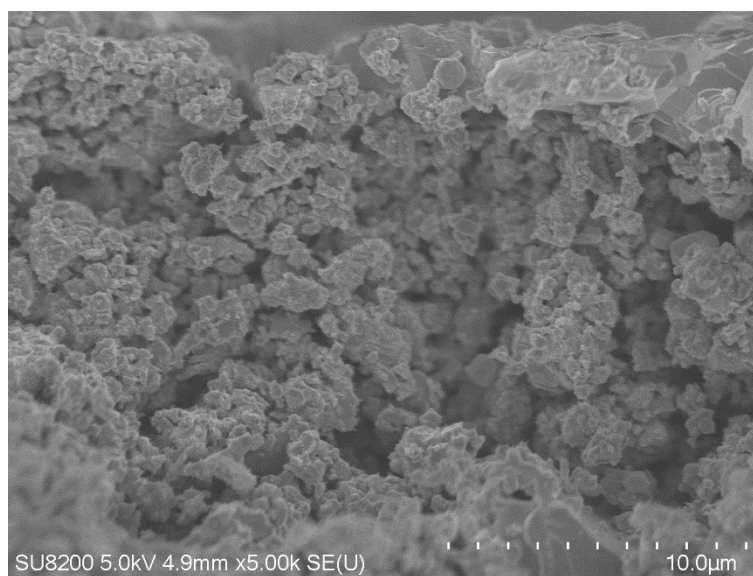

**Figure S6.** High resolution SEM microstructure of cathode electrode after 260 hours' long-term test.

### SFM|LSGM|SFM symmetrical SOEC

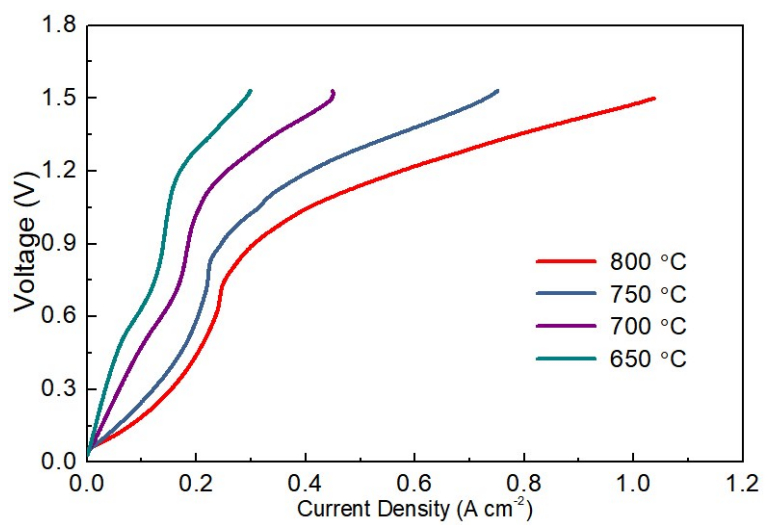

**Figure S7.** I-V curves of the symmetrical SOEC with configuration of SFM|LSGM|SFM applied to electrolyze pure CO<sub>2</sub>.



**Table S1.** Room-temperature structural parameters of SEF powders.

| Sample | a/b (Å) | c (Å)   | $\alpha=\beta=\gamma$ | R <sub>p</sub> (%) | R <sub>wp</sub> (%) | $\chi^2$ |
|--------|---------|---------|-----------------------|--------------------|---------------------|----------|
| SEF    | 5.4965  | 19.8637 | 90°                   | 2.75               | 3.48                | 2.20     |

**Table S2.** Summary of some typical symmetrical SOECs for pure CO<sub>2</sub> electrolysis measured at 800 °C.

| Electrodes                                                                                                      | R <sub>p</sub> (Ωcm <sup>2</sup> ) | Current density<br>(Acm <sup>-2</sup> ) | V (V)      | Ref.             |
|-----------------------------------------------------------------------------------------------------------------|------------------------------------|-----------------------------------------|------------|------------------|
| La <sub>0.3</sub> Sr <sub>0.7</sub> Fe <sub>0.7</sub> Ti <sub>0.3</sub> O <sub>3-δ</sub>                        | 0.35 @1.2V                         | 0.28                                    | 1.5        | 1                |
| La <sub>0.3</sub> Sr <sub>0.7</sub> Fe <sub>0.7</sub> Cr <sub>0.3</sub> O <sub>3-δ</sub>                        | 1.33@OCV                           | 0.32 (9CO <sub>2</sub> :CO)             | 1.5        | 2                |
| La <sub>0.75</sub> Sr <sub>0.25</sub> Cr <sub>0.5</sub> Mn <sub>0.5</sub> O <sub>3-δ</sub> -SDC                 | 2.8@1.5V                           | 0.09                                    | 1.5        | 3                |
| La <sub>0.6</sub> Sr <sub>0.4</sub> Fe <sub>0.8</sub> Ni <sub>0.2</sub> O <sub>3-δ</sub> -GDC                   | 0.91@OCV                           | 0.55                                    | 1.5        | 4                |
| La <sub>0.6</sub> Sr <sub>0.4</sub> Fe <sub>0.9</sub> Mn <sub>0.1</sub> O <sub>3-δ</sub> -GDC                   | 0.85@OCV                           | 0.35                                    | 1.5        | 5                |
| La <sub>0.4</sub> Sr <sub>0.6</sub> Co <sub>0.2</sub> Fe <sub>0.7</sub> Nb <sub>0.1</sub> O <sub>3-δ</sub> -GDC | 0.68@OCV                           | 0.44                                    | 1.5        | 6                |
| La <sub>0.6</sub> Ca <sub>0.4</sub> Fe <sub>0.8</sub> Ni <sub>0.2</sub> O <sub>3-δ</sub> -GDC                   | 0.70@OCV                           | 0.75                                    | 1.5        | 7                |
| La <sub>0.75</sub> Sr <sub>0.25</sub> Cr <sub>0.5</sub> Mn <sub>0.5</sub> O <sub>3-δ</sub> -SDC-Fe              | 0.6@2.0V                           | 0.25                                    | 1.5        | 8                |
| MnCo <sub>2</sub> O <sub>4</sub> -GDC                                                                           | 1.43@OCV                           | 0.75                                    | 1.5        | 9                |
| <b>Sr<sub>2</sub>Fe<sub>1.5</sub>Mo<sub>0.5</sub>O<sub>6-δ</sub></b>                                            | <b>0.85@OCV</b>                    | <b>1.04</b>                             | <b>1.5</b> | <b>This work</b> |
| <b>SrEu<sub>2</sub>Fe<sub>2</sub>O<sub>7</sub></b>                                                              | <b>0.27@OCV, 800</b>               | <b>1.27</b>                             | <b>1.5</b> | <b>This work</b> |

## Reference

1. Z. Cao, B. Wei, J. Miao, Z. Wang, Z. Lü, W. Li, Y. Zhang, X. Huang, X. Zhu, Q. Feng and Y. Sui, *Electrochem. Commun.*, 2016, **69**, 80-83.
2. P. Addo, B. Molero-Sanchez, M. Chen, S. Paulson and V. Birss, *Fuel Cells*, 2015, **15**, 689-696.
3. S. Xu, S. Li, W. Yao, D. Dong and K. Xie, *J. Power Sources*, 2013, **230**, 115-121.
4. Y. Tian, H. Zheng, L. Zhang, B. Chi, J. Pu and J. Li, *J. Electrochem. Soc.*, 2018, **165**, F17-F23.
5. X. Peng, Y. Tian, Y. Liu, W. Wang, L. Jia, J. Pu, B. Chi and J. Li, *J. CO<sub>2</sub> Util.*, 2020, **36**, 18-24.
6. Z. Yang, C. Ma, N. Wang, X. Jin, C. Jin and S. Peng, *J. CO<sub>2</sub> Util.*, 2019, **33**, 445-451.
7. Y. Tian, L. Zhang, Y. Liu, L. Jia, J. Yang, B. Chi, J. Pu and J. Li, *J. Mater. Chem. A*, 2019, **7**, 6395-6400.
8. C. Ruan, K. Xie, L. Yang, B. Ding and Y. Wu, *Int. J. Hydrogen Energ.*, 2014, **39**, 10338-10348.
9. L. Zhang, Y. Tian, Y. Liu, L. Jia, J. Yang, B. Chi, J. Pu and J. Li, *ChemElectroChem*, 2019, **6**, 1359-1364.
